# Supplementary material for: The Molecular Mechanism of Nitrate Chemotaxis via Direct Ligand Binding to the PilJ Domain of McpN
Source: PubMed Central journal article supplement (PMC6381276; doi:10.1128/mbio.02334-18), 2019-02-19
Supplement: mBio.02334-18-sf006.pdf [file mBio.02334-18-sf006.pdf]

Fig. S6

```

                                     120      130      140      150      160
                                     |        |        |        |        |
WP_083651730 [Photobacterium proteolyticum]  GIIYYGMEA-DAATINVAGRQRMLSQRVAKEVLLVQSGMEQ----QEGVNKTIKL
OLQ80001 [Photobacterium proteolyticum]     GIIYYGMEA-DAATINVAGRQRMLSQRVAKEVLLVQSGMEQ----QEGVNKTIKL
EDQ01086 [Shewanella benthica KT99]        AIIYNDMQA-DAATINIAGRQRMLSQLVAKEVLLLQFGVGR----DTGVKKAIEL
WP_040571760 [Shewanella benthica]         AIIYNDMQA-DAATINIAGRQRMLSQLVAKEVLLLQFGVGR----DTGVKKAIEL
WP_022940319 [Psychromonas hadalis]        SIIYSSMEA-DATTINVAGKQRMLSQRIAKEVLLVQFSSLE----KQQVQQTITQ
WP_104417027 [Marinobacter persicus]       SFLYFSTDPGEARSLNVAGAQRMLSSQRVAKEVQMVAAGVEE----PAQAQKTIEQ
KXS52579 [Marinobacter sp. T13-3]         SFLYFSTDPGEARSLNVAGAQRMLSSQRVAMEVQMVAAGVED----PAQAQKTIEQ
KXS51160 [Marinobacter sp. T13-3]         SFLYFSTDPGEARSLNVAGAQRMLSSQRVAKEVQMVAAGVEE----PAQAQKTIEQ
WP_104425587 [Marinobacter persicus]       SFLYFSTDPGEAKSLNVAGAQRMLSSQRVAKEVQMVAAGVEE----SSQAQQTIDQ
WP_104416353 [Marinobacter persicus]       SFLYFSTDPGEAKSLNVAGAQRMLSSQRVAKEVQMVAAGVEE----SSQAQQTIDQ
PKM00178 [Gammaproteobacteria bacterium HGW]  -----SSK--DASQIDMAGAQRMLSSQKMMKEALLAAQGIGS----PADVDRTIQR
PKM12203 [Gammaproteobacteria bacterium HGW]  AVLFMSAK--DASQIDMAGAQRMLSSQKMMKEALLAAQGVGD----KAAVDKTIQR
CJK46151 [Streptococcus pneumoniae]        GVLFMSSK--DASQIDMAGAQRMLSSQKMMKEALLAAQGIGS----PADVDKTIQR
McpN [P. aeruginosa PA01]                  VALYLSMSI-SPETINVAGAQRMLSSQKMAREALQLRLGAGD----PKALAATIAQ
OUC50533 [Eggerthia catenaformis]          VALYLSMSI-SPETINVAGAQRMLSSQKMAREALQLRLGAGD----PKALAATIAQ
SAJ26551 [Enterobacter cloacae]            VALYLSMSI-SPETINVAGAQRMLSSQKMAREALQLRLGAGD----PKALAATIAQ
PKM29122 [Gammaproteobacteria-12]          VALYLSMSV-SPETINIAGAQRMLSSQKMTKEALLQREGVLP----AATLEATMAQ
WP_027848104 [Marinospirillum minutulum]   VSLYMSLSV-SPETINVAGAQRMLSSQKMTKEALLITQGVVE----RKVLDSTINS
WP_027850591 [Marinospirillum insulare]    ISLYMSLSV-SPETINVAGAQRMLSSQKMTKEALLIIGKVEN----KTVLDKTVAS
WP_072325584 [Marinospirillum alkaliphilum] VSLYMSLSV-SPETINVAGAQRMLSSQKMTKEALLITQGASD----RGTLDATMRQ
WP_091963700 [Marinospirillum celere]      ASLFMSLSV-SPETINVAGAQRMLSSQKMTKEALLITQGVGD----QATLNATQRQ
WP_068999334 [Terasakiispira papahanaumokuakeensis] VSLFMSMSV-SPQTINVAGAQRMLSSQKMTKEVLLLEVGAVD----QQTLQTTMQR
SFX75036 [Marinospirillum alkaliphilum DSM 21637] ISLYLSMSV-SPETINVAGAQRMLSSQKITRDVLLVQVQAEQ----QQVLNRTIQR
WP_084662276 [Marinospirillum alkaliphilum] ISLYLSMSV-SPETINVAGAQRMLSSQKITRDVLLVQVQAEQ----QQVLNRTIQR
WP_086481606 [Oceanospirillum sanctuarii]  VSLYLSMAI-DPQTINIAGRQRMLSQKMAKEALLVAAQVEN----KSTLQKTMQL
WP_078320434 [Oceanospirillales]          IFLYLSMAI-DPQTINIAGRQRMLSQKMAKEALLVASQVEN----KSTLQKTMQL
WP_102043389 [Oceanospirillum maris]       VSLYLSMAI-DPQTINIAGRQRMLSQKMAKEALLVAAQVEN----KTTLQKTMQL
WP_028300494 [Oceanospirillum bejerinckii] VSLYLSMAI-NPQTINIAGRQRMLSQKIAKEALLVAAQVEN----QNTLQKTMQL
WP_078743715 [Oceanospirillum multiglobuliferum] VALYMSMAI-NPQTINVAGRQRMLSQKIAKEALLVAAKIEN----EAVLRKTMQL
EAR59890 [Oceanospirillum sp. MED92]      ISLYFSMAI-NPQTINMAGRQRMLSQKIAKEALLVAAQVEQ----QSTLKKTMEL
WP_083774892 [Neptuniibacter caesariensis] ISLYFSMAI-NPQTINMAGRQRMLSQKIAKEALLVAAQVEQ----QSTLKKTMEL
WP_093308400 [Pseudospirillum japonicum]  IALYLSMSI-NPQTINIAGRQRMLSQKMAKEALLVAVNIEN----TSNLQATMQM
WP_051252630 [Ferrimonas kyonanensis]     VMLYATSGN-SAEMINVAGAQRMLSSQRVAKEALLVQGGVD----HAALDKTVAR
```

|                                                        |                                                           |
|--------------------------------------------------------|-----------------------------------------------------------|
| WP_075186461 [Alteromonadales bacterium BS08]          | LSLYISMSV-SANTVDIAGRQRMLSQLAKEAFLVNGAEQ----MEAVRSTIGL     |
| WP_045855660 [Alteromonadaceae bacterium Bs12]         | GSMYLTLDI-TADTVDVAGRQRMLTQRLAKEAFLVANEAEF----QSVVQETITE   |
| WP_018274184 [Teredinibacter turnerae]                 | FSLYMTMQA-SADTVNIAGRQRMLSQLAKEALLVGQQAMD----KSALEQTIEL    |
| WP_019606173 [Teredinibacter turnerae]                 | FSLYMTMQA-SADTVNIAGRQRMLSQLAKEALLVGQQAMD----KSALEQTIEL    |
| WP_045827023 [Teredinibacter sp. 991H.S.0a.06]         | FSLYMTMQA-SADTVNIAGRQRMLSQLAKEALLVAQQAMD----KSALEQTIEL    |
| WP_028885168 [Teredinibacter turnerae]                 | FSLYMTMQA-SADTVNIAGRQRMLSQLAKEALLVGQQAMD----KSALEQTIEL    |
| WP_028881853 [Teredinibacter turnerae]                 | FSLYMTMQA-SADTVNIAGRQRMLSQLAKEALLVAQQAMD----KSALEQTIEL    |
| WP_018415357 [Teredinibacter turnerae]                 | FSLYMTMQA-SADTVNIAGRQRMLSQLAKEALLVAQQAMD----KSALEQTIEL    |
| WP_015819270 [Teredinibacter turnerae]                 | FSLYMTMQA-SADTVNIAGRQRMLSQLAKEALLVTQQAMD----KSALEQTIEL    |
| WP_028876398 [Teredinibacter turnerae]                 | FSLYMTMQA-SADTVNIAGRQRMLSQLAKEALLVTQQAMD----KSALEQTIEL    |
| WP_019602011 [Teredinibacter turnerae]                 | FSLYMTMQA-SADTVNIAGRQRMLSQLAKEALLVTQQAMD----KSALEQTIEL    |
| WP_011467154 [Saccharophagus degradans]                | ISLYLSMSS-SANTVDVAGRQRMLSQLAKEALLVGAGVES----RATMQSTIDL    |
| WP_082067039 [Teredinibacter sp. 1162T.S.0a.05]        | GSLYLTMSA-SAETVNIAGRQRMLSQLAKEALLIRTGAEN----EAIQQQTIAL    |
| WP_027328238 [Marinimicrobium agarilyticum]            | GVSYLSLSA-TAETVDVAGRQRMLIQRLAKEAMLTEQGALD----ASGLNATIEL   |
| WP_076717438 [Motiliproteus sp.MSK22-1]                | GSLYLTMSA-SAETINVAGRQRMLSQLAKEATLMVVQGVVEQ----KVAVEKTMQL  |
| WP_076714176 [Motiliproteus sp.MSK22-1]                | VSLYFSLSN-DAATINEAGRQRMLSQLAKEAMMVVQGVVEE----KAVLEKTIKL   |
| WP_081475260 [Marinobacterium stanieri]                | VSVWMTGSD-DATAINVAGKQRMLSQLAKEATLLIQQGAVD----TGLAQATIRS   |
| WP_076462706 [Marinobacterium stanieri]                | VSVWMTGSD-DATAINVAGKQRMLSQLAKEATLLIQQGAVD----TGLAQATIRS   |
| WP_091825072 [Marinobacterium georgiense]              | AAVYLSNDT-DASAINVAGAQRMLSQLKMAKEVLLLLSQDVGD----RSGVTKTMNA |
| PKM43282 [Gammaproteobacteria bacterium HGW]           | ASLFYFGFT-DATSINVAGAQRMLSQLKAKEALLAGQGGES----RETVYATLAQ   |
| PKM45884 [Gammaproteobacteria bacterium HGW]           | ASLYFSIST-DATSINVAGAQRMLSQLKAKEALLAGQGVES----RDTVLATIRQ   |
| OOZ41054 [Solemya velesiana gill symbiont]             | ASLYFSLGS-DATSINVAGRQRMLSQLKAKEAMLAAQKVES----LQAVEKTIAL   |
| WP_078483146 [Solemya velesiana gill symbiont]         | ASLYFSLGS-DATSINVAGRQRMLSQLKAKEAMLAAQKVES----LQAVEKTIAL   |
| WP_083220704 [Candidatus Thiodiazotropha endolucinida] | VSLF'TSLGS-DATAINVAGRQRMLSQLKAKEALLAAQSIES----RDTVNNTIAL  |
| ODJ87354 [Candidatus Thiodiazotropha endolucinida]     | VSLF'TSLGS-DATAINVAGRQRMLSQLKAKEALLAAQSIES----RDTVNNTIAL  |
| WP_084594071 [Arhodomonas aquaeolei]                   | ASLYFSLGS-SATAVDIAGRQRMLSQLVAKEAVMAVQGVGS----REDVEKTIAL   |
| WP_029132713 [Sedimenticola selenatireducens]          | ITIYLSLGV-NSNSIDVAGRQRMLSQLAKEAMLVAQQAES----REVMKKTINL    |
| PLX63594 [Sedimenticola selenatireducens]              | ITIYLSLGV-NSNSIDVAGRQRMLSQLAKEAMLVAQQAES----REVMKKTINL    |
| WP_057957096 [endosymbiont of Ridgeia piscesae]        | ASIYWSLDS-DAAAINIAGRQRMLSQLVAKEALMVVQGVES----PAVVQKTIAL   |
| WP_067616512 [Dissulfuribacter thermophilus]           | LKTVYQQRG-DAVAINIAGRQRMLTQKMTKEALFFNSTQNDK--WKSSLDATIVL   |
| WP_083779049 [Desulfarculus baarsii]                   | IVLLGLQET-DGQVNIAGRQRMLSQLRMTKEALILASGDRAAAKN---LAATLEL   |
| ADK86400 [Desulfarculus baarsii DSM 2075]              | IVLLGLQET-DGQVNIAGRQRMLSQLRMTKEALILASGDRAAAKN---LAATLEL   |
| WP_053111464 [Desulfocarbo indianensis]                | IILLGMQEA-DGVVVDIAGRQRMLSQLKMTKEALLLLSSGGNTEKDRKELKATADL  |
| WP_072909408 [Malonomonas rubra]                       | VFVNLGQKD-DSTVNIAGRQRMLSQLKMSKEALSIAAGLEVSSNR-DSLKQTADL   |
| ENN95934 [Methanocaldococcus villosus KIN24-T80]       | TILLKDMEH-DANIINIAAGKQRMLIQKMSKEAFMIALGNL---EMKKELIKTAQE  |
| WP_017981124 [Methanocaldococcus villosus]             | TILLKDMEH-DANIINIAAGKQRMLIQKMSKEAFMIALGNL---EMKKELIKTAQE  |
| WP_079710389 [Paraliobacillus ryukyensis]              | NMFLTEQET-DATIINVAGKQRMLIQKMSKEALIVSDGN----GSADDLVETINL   |

ODS31255 [Candidatus Scalindua rubra] ---MLEKKASDPVKINLAGKQRMLTQKMSKEAIALSQG----IGSTESLEKTANL  
 ODS31259 [Candidatus Scalindua rubra] TISFLNKQKADGVVINLAGKQRMLTQKMSKEALAVSQG----TGSKESLEKTADL  
 ODS31256 [Candidatus Scalindua rubra] VIVLMNSQKDDGAVINLAGKQRMLTQKMSKEAIALSQG----IGSKQSLVKTINL  
 DAB34330 [Sulfurospirillum sp. UBA12182] NVIMNDKSKKDSLIIINLAGKQRMLTQKMSKEIFYLKQKD---SIDFRELN SAVDE  
 DAB32648 [Sulfurospirillum sp. UBA11407] NVIMNDKSKKDSLIIINLAGKQRMLTQKMSKEIFYLKQKD---SIDFRELN SAVDE  
 OQY52690 [Beggiatoa sp. 4572\_84] ACGGGVTKQEMGVIMDLAGKQRMLTQKMTKEILLIAKGINV-AENKKKLRQTAIL  
 OAD20060 [Candidatus Thiomargarita nelsonii] -----MSIDLAKGQRMLTQKMSKEILLIAKNIDR-DDNKKNLCEAAL  
 KHD07211 [Candidatus Thiomargarita nelsonii] AY--AATQQEMATTINLAGKQRMLTQKMSKEILLIAKGINV-AANKKNLQKTAAL  
 WP\_083760414 [Sulfurovum sp. NBC37-1] AV--AQTQQSGVVINLAGKQRMLTQKMSKEALYIAKGIDA-EANTENLKKTAAL  
 BAF71977 [Sulfurovum sp. NBC37-1] AV--AQTQQSGVVINLAGKQRMLTQKMSKEALYIAKGIDA-EANTENLKKTAAL  
 WP\_103922382 [Thiotrichales bacterium HS\_08] AQ--ASSKTEMGKVINLAGKQRMLTQKMSKEALYIAKGVDA-TGNQGNLKKTAAL  
 WP\_038034074 [Thermopetrobacter sp. TC1] NAIVEQSSAELAVQINLGRQRMLTQKMSKEAFLVALGVDP-EENRQNAARAAAL  
 OQX74572 [Campylobacteraceae bacterium 4484\_4] SF--ALTTKQLAVSINLAGKQRMLTQKMTKEALLIKAGVEK-EQNLLKLEATSTL  
 OGX22015 [Omnitrophica WOR\_2 bacterium GWF2\_43\_52] GFC-APTPEQWGIIMNISGRQRMLTQKMSKEALLIAGINP-DENLKKLAESMKL  
 OGR47178 [Elusimicrobia bacterium GWA2\_66\_18] SS--AASEKEFAKVINVAGRQRMLTQKMAAEFLLMKLGIAA-EDNKKKMDADIST  
 OGR71769 [Elusimicrobia bacterium GWC2\_65\_9] SS--AASEKEFAKVINVAGRQRMLTQKMAAEFLLMKLGIAA-EDNKKKMDADIST  
 PIQ95337 [Nitrospinae bacterium CG11] TVFTLENQKLDGNVINLAGKQRMLTQKLSKSIMELQLG--D-LSKTGEIGQIKTE  
 WP\_037929253 [Sulfitobacter pseudonitzschiae] TAQVAASGS AVVVRVDISGRQRMLTQRMAMASC FVMGDVET EKN-IKNAHQAYDL

|              | 175     | 185   | 195     | 205                | 215                     |
|--------------|---------|-------|---------|--------------------|-------------------------|
| WP_083651730 | FESSMNL | LRNGD | KEQGI   | SAPKTPEIEAQLSKVNEL | WLEYRAGIQKLLQIDESQLR    |
| OLQ80001     | FESSMNL | LRNGD | KEQGI   | SAPKTPEIEAQLSKVNEL | WLEYRAGIQKLLQIDESQLR    |
| EDQ01086     | FESSMNL | LLNGD | TKRGI   | SAPMTPEIKSRLGKVNKL | WISKYREGIQALLLLGDKDQH   |
| WP_040571760 | FESSMNL | LLNGD | TKRGI   | SAPMTPEIKSRLGKVNKL | WISKYREGIQALLLLGDKDQH   |
| WP_022940319 | FESSMNL | LINGD | ESAGI   | HAFSDVAIKTQLLKVKD  | TWQEYRINIEQILQLSPFDLA   |
| WP_104417027 | WERAHGW | LLNGS | EEAGV   | PAVKDPEIRAQLESVFAL | WQEYRPAALVDYMNAPDT---   |
| KXS52579     | WERAHGW | LLNGS | EEAGV   | PAVKDPEIRAQLESVFAL | WQYRPAALVDYMNAPDT---    |
| KXS51160     | WERAHGW | LLNGS | EEAGV   | PAVKDPEIRAQLEHVLT  | TLWQYRPAALVDYMNAPDT---  |
| WP_104425587 | WERAHGW | LLNGS | EEAGV   | PAVTDTAIRAQLEHVLT  | TLWQDYRPAALVEYMEAPDT--- |
| WP_104416353 | WERAHGW | LLNGS | EEAGV   | PAVTDTAIRAQLEHVLT  | TLWQDYRPAALVEYMEAPDT--- |
| PKM00178     | FEQSHR  | LLLN  | GDRAQGI | APVELASAKPHLQRVDQ  | IWQRYRPA-VQALAAGQS---   |
| PKM12203     | FEQSHR  | LLLN  | GDRAQGI | APVELTSAQPHLQRVDQ  | IWQRYRPA-VQALAAGQS---   |
| CJK46151     | FEQSHR  | LLLN  | GDRAQGI | VRVELASAPYLQRVDQ   | IWQRYRPA-VQALAAGQS---   |
| McpN_LBD     | YERSAAD | LDAG  | NAERNV  | SRMGAP EIAAQRQKVAQ | IWGRYRAMLDQVAQPAS----   |
| OUC50533     | YERSAAD | LDAG  | NAERNV  | SRMGAP EIAAQRQKVAQ | IWGRYRAMLDQVAQPAS----   |

SAJ26551 YERSAADLDAGNAERNVSRMGAPEIAAQRQKVAQIWGRYRAMLDQVAQPAS-----  
PKM29122 FDAAHRDLLSGNAVRNISAIAEPGIAQMNKVGGLWQGFRTQLQRVVA-GD-----  
WP\_027848104 FERAHQDLLVGNRERNITAFDDEEIHQQMQQVDQLWQQMKARLEQAVNKQD-----  
WP\_027850591 FETAHKDLIAGNRDRDITAFDDSEIQQQMQQVDQLWQQMKVRLDQALVQQD-----  
WP\_072325584 FEQAHRDLLQGNRERNITAFDDPAIRQQMQRVDQLWQQMKTRLDATLTNP-----  
WP\_091963700 FEQAHRDLIQGNPERNISAIDDPVIRQQMQRVDQLWQQIQDSLQEVVNNPN-----  
WP\_068999334 FETAHRDLMAGNPAKNIIVFDDPVIQRQQMQTVDDQLWQQMASLINRQLQDPQ-----  
SFX75036 FDAAHRDLVQGNPERSISRINDPVVQQQLQQVEVSWQEFQGVINYLKQPL-----  
WP\_084662276 FDAAHRDLVQGNPERSISRINDPVVQQQLQQVEVSWQEFQGVINYLKQPL-----  
WP\_086481606 FESSHKDIINGNKAQGMNPTDKEILGQMVKVESLWKDYSKTLLQYADNPT-----  
WP\_078320434 FERSHKDIINGNKAQGMNPTDPSILSQMIVENLWSGYSKILLQYTDSPS-----  
WP\_102043389 FEQSHDHLINGNKSLSMNPIDPEIVAQMQRVQDLWRSYSITLLEYAERP-----  
WP\_028300494 FERSHKDIIHGNTELGMNPINDKAILAQMQRVGLWQSYKGMINRYASTPT-----  
WP\_078743715 FEQSHRDIIVGNVEQGMNPTNPVLSQMQRVGLWRDYSALVERYIANPN-----  
EAR59890 FESSHKKIMLGNNEELGMNAIKDSEILKQMQHVETLWATYKGVIESHITQPS-----  
WP\_083774892 FESSHKKIMLGNNEELGMNAIKDSEILKQMQHVETLWATYKGVIESHITQPS-----  
WP\_093308400 FDRSHQDI IQGNTQQGMNPTDEIDILQQMAVVGRLWQDYRELLLAYVQAPS-----  
WP\_051252630 FERAHRLLLEGDANRGLPPVSEPAIVQQLNRVGEFWSYRQQVDAYLMAPS-----  
WP\_075186461 FENSHRDLLAGNRNADIQPPATKAIESQLKKVEGVWNGYQQSVTRYINSQQ-----  
WP\_045855660 FERSHRDLMMGNKRAZIAIP-TSEVLAQLKEVERVWRQYKLTVAAYIRSKN-----  
WP\_018274184 FEQSHNRLLYGSPENGI LAPQTVKIFDKLKVVGGMWENYKIAIRTYATTQD-----  
WP\_019606173 FEQSHNRLLYGSPENGI LAPQTVKIFDKLKVVGGMWENYKIAIRTYASTQD-----  
WP\_045827023 FEQSHNRLLYGSPENGI LAPQTVKIFDKLKVVGGMWENYKIAIRTYAATQD-----  
WP\_028885168 FEQSHNRLLYGSPENGI LAPQTVKIFDKLKVVGGMWENYKIAIRTYATTQD-----  
WP\_028881853 FEQSHNRLLYGSPENGI LAPQTVKISDKLKAVGGMWENYKIAIRTYVATKD-----  
WP\_018415357 FEQSHNRLLYGSPENGI LAPQTVKISDKLKAVGGMWENYKIAIRTYVASKD-----  
WP\_015819270 FEQSHNRLLYGSPENGI LAPQTVKIFDQLKVVDGLWENYKIAIRTYVASKD-----  
WP\_028876398 FEQSHNRLLYGSPENGI LAPQTVKIFDQLKVVDGLWENYKIAIRTYVASKD-----  
WP\_019602011 FEQSHNRLLYGSPENGI LAPQTVKIFDQLKVVDGLWENYKIAIRTYVASKD-----  
WP\_011467154 FERSHRKLLISGDQSDDIHPPATQEI KQALVTVEKQWAEYKRLVNHYVSAKD-----  
WP\_082067039 FESSHQALMNGDKDKGIHAPESAEIKQQQLQKVEALWLEYKKGIASLIAGED-----  
WP\_027328238 FEQSHQNLINGNESAGIQPPQTAEINQSLLNLVLEWQWNYKAIIFDYIGADP-----  
WP\_076717438 FESSHQDLINGNPSTGIVAPATPQISQQLEHVGSLWTDYKQTINNYLVDAS-----  
WP\_076714176 FSDSHLHLINGNPESGISAPANAEIRKQLEHVGQLWQHYQSAISNYLENPN-----  
WP\_081475260 FEAAHKALLINGNADMGIKAASEVDIRKQLEHVGTLWRDYRATVEQLVSGTDGN--  
WP\_076462706 FETAHRALLINGNAGLGIKAASEVDIRKQLEHVGTLWRDYRATVEQLVSGSDGN--  
WP\_091825072 FESAHQALLNGSAEQGIKAAEDAEIRSRLEQVGTLWNSYRATLNQYLQQPD-----

PKM43282 FESVHQALLQGDAQRDI AVVTDTAVRAQLQKVGQVWKEYRQEIVAYVEQPA----  
PKM45884 FEGAHRALLEGDAQRGMRAVKDAAVRTQLQKVEQLWQAYKQDILAYIEQPD----  
OOZ41054 FESSHNALLQGDKKQKIDAVKAKPIIDQLKHVEQLWGKYKVHILSYSNNPT----  
WP\_078483146 FESSHNALLQGDKKQKIDAVKAKPIIDQLKHVEQLWGKYKVHILSYSNNPT----  
WP\_083220704 FESSHQNLNLDQNAGIQAVDDPVVRGQLNKVEGLWITYRESIDAYLENPS----  
ODJ87354 FESSHQNLNLDQNAGIQAVDDPVVRGQLNKVEGLWITYRESIDAYLENPS----  
WP\_084594071 FESSHRKLLQGDPMGIEPVQDPAIRDQLREVQSLWQRYRGDIQAYLDEPT----  
WP\_029132713 FESSHKALFEGDEAQNILPVKDALILEQLKLVEQLWSGYKQVITQYAASPD----  
PLX63594 FESSHKALFEGDEAQNILPVKDALILEQLKLVEQLWSGYKQVITQYAASPD----  
WP\_057957096 FEDSQHRLLLGDPEAGITPPMNEAIRQQLAKTSQLWSAYRRHLEAYLATPS----  
WP\_067616512 FEKSLNGLAVGDAELGLSGTTDKGVQEELNKLQQMWIPFKKALYIITDTSSSK--  
WP\_083779049 FDASLRGLIEGDAAMGLPPTDDSRIAAQMQKVAALWGPFRQSAEIVLRAGGSADP  
ADK86400 FDASLRGLIEGDAAMGLPPTDDSRIAAQMQKVAALWGPFRQSAEIVLRAGGSADP  
WP\_053111464 FDRSLQGLIGGDAAMGLPPTTNPDILAQMKTVSELWKPFFHANLTGVTITTDINSP  
WP\_072909408 FASSLNSLINGDEKLNLPPTQNPQILSQMRQVEVLWDFNFSPHIDTFVNP-ASTEA  
ENN95934 FDKNLNDLINGNEERGITPAPP-IVKAQLLKVKSMWSEFYKNILIIYEK-DPSDP  
WP\_017981124 FDKNLNDLINGNEERGITPAPP-IVKAQLLKVKSMWSEFYKNILIIYEK-DPSDP  
WP\_079710389 FDEAIEGLMGGSKSLGLPKMPSEEVANQLQSVELLWQPFFKENLQMIAN--DNGN-  
ODS31255 FDKTLRGLISGDEELRLSPTKDPKIIISQLNHIQGLWQDFRANLNAVLANPTGA--  
ODS31259 FDKTLKGLISGDKELGLPATKNIEILSQLNQVQKLWKDLHANLDVVLANSVDT--  
ODS31256 FDKTLKGLVSGDSELNLPATSNPEILGQLNHVQKLWKDLHANLSIVLANSVDT--  
DAB34330 FSENKDLLEGNSVKGIIYHPQDEKIEAKLQKVQKIWFPPFKEKIEALKKLIQEN--  
DAB32648 FSENKDLLEGNSVKGIIYHPQDEKIEAKLQKVQKIWFPPFKEKIEALKKLIQEN--  
OQY52690 FNKTLIGLFDGSELGLVKVENPHIVQQLNKVADLWREFRNNVDAVLRG-NTS--  
OAD20060 FNQTLIGLIEGDSELGLVETEKPAIKQQLYKVVVELWKNFRINVDVAVLMG-NTS--  
KHD07211 FERTLKGLLNLDARLGLVKTENAAIVKQLKKVGRILWGFQRQNVKAVLAG-NTS--  
WP\_083760414 FDKTLKGLIGGDSNLNPKTDNKEILAQLQKVTDLWVPPFKANIDKVIAG-KAD--  
BAF71977 FDKTLKGLIGGDSNLNPKTDNKEILAQLQKVTDLWVPPFKANIDKVIAG-KAD--  
WP\_103922382 FDRTLKGLKGDADLGLPKTTDAGILAQLDVVAKLWITFKGNIDAVLAG-KTS--  
WP\_038034074 FERTLKGLMQGDEALKLAPAPNEKILAQLKKVEGLWRRFKPLIEKVAAG-DVS--  
OQX74572 FDRTLKGLIKGDEGLKLPKPCQNAEVQKQLGVVQQLWKPFRQNMIRVIQG-KAD--  
OGX22015 FETSHHALTEGDAAMNIPACEFPDISEQLEKVSILYAECLKIFDKMVEGEKAD--  
OGR47178 FDKSLASLSNGDGEAGIPAPPNEQISRQFAQVKLLWGSYVRALQSAGTS-----  
OGR71769 FDKSLASLSNGDGEAGIPAPPNEQISRQFAQVKLLWGSYVRALQSAGTS-----  
PIQ95337 FEGVLSGLKRGDTEKGLVAAETPEIMAMLEATEKLLWLPFAERVDKVASLWPGI--  
WP\_037929253 FSQTQGVLRHGGTRDNLEPERDPQVLALLDQSDEIFDITYGRAVLQVTHQDLQ---
